# Supplementary material for: Virally programmed extracellular vesicles sensitize cancer cells to oncolytic virus and small molecule therapy
Source: PubMed Central journal article supplement (PMC8990073; doi:10.1038/s41467-022-29526-8), 2022-04-07
Supplement: 41467_2022_29526_MOESM4_ESM.pdf [file 41467_2022_29526_MOESM4_ESM.pdf]

### **Supplementary Data 1.**

Description: A Sindbis virus-based amiRNA library was serially passaged in MIA PaCa-2 cells (n=5), PanC02 cells (n=5), PCa fibroblasts (n=5), and GM38 fibroblasts (n=5). Target RNA sequencing was conducted to elucidate top amiRNA sequences enriched upon selection. Full targeted RNA sequencing data of unpassaged Sindbis virus-based amiRNA library or library passaged is included.

### **Supplementary Data 2.**

Description: Expression of amiR-4 from a VSV $\Delta$ 51 platform did not induce drastic changes in the immune tumour microenvironment when compared to virus control in the presence or absence of GSK126 treatment. Full NanoString data set of B16-F10 tumours (n= 2 per group) treated with PBS (Vehicle control), VSV $\Delta$ 51-amiR-NTC control and VSV $\Delta$ 51-amiR-4 treatment (1E8 pfu/mouse) alone or in combination with Captisol (vehicle control) or GSK126 (50 mg/kg) is included.
